# Supplementary material for: Decadal Changes in the Abundance and Length of Snapper (Chrysophrys auratus) in Subtropical Marine Sanctuaries
Source: PLoS One. 2015 Jun 10;10(6):e0127616. doi: 10.1371/journal.pone.0127616 (PMC4464656; doi:10.1371/journal.pone.0127616)
Supplement: S1 Dataset — (XLSX) [file pone.0127616.s001.xlsx]

## Sheet: MaxN Shallow
Year (Y)	Management Type (M)	Site	rep	MaxN
2002	SZ	S1	1	2
2002	SZ	S1	2	0
2002	SZ	S1	3	0
2002	SZ	S2	1	0
2002	SZ	S2	2	0
2002	SZ	S2	3	0
2002	SZ	S3	1	1
2002	SZ	S3	2	0
2002	SZ	S3	3	0
2002	HPZ	H1	1	0
2002	HPZ	H1	2	0
2002	HPZ	H1	3	0
2002	HPZ	H2	1	1
2002	HPZ	H2	2	0
2002	HPZ	H2	3	0
2002	HPZ	H3	1	1
2002	HPZ	H3	2	0
2002	HPZ	H3	3	0
2002	Outside	O3	1	0
2002	Outside	O3	2	0
2002	Outside	O3	3	0
2002	Outside	O1	1	3
2002	Outside	O1	2	0
2002	Outside	O1	3	0
2002	Outside	O2	1	0
2002	Outside	O2	2	1
2002	Outside	O2	3	4
2003	SZ	S1	1	1
2003	SZ	S1	2	0
2003	SZ	S1	3	0
2003	SZ	S2	1	1
2003	SZ	S2	2	0
2003	SZ	S2	3	1
2003	SZ	S3	1	1
2003	SZ	S3	2	0
2003	SZ	S3	3	0
2003	HPZ	H1	1	1
2003	HPZ	H1	2	0
2003	HPZ	H1	3	0
2003	HPZ	H2	1	0
2003	HPZ	H2	2	0
2003	HPZ	H2	3	0
2003	HPZ	H3	1	1
2003	HPZ	H3	2	0
2003	HPZ	H3	3	0
2003	Outside	O3	1	0
2003	Outside	O3	2	1
2003	Outside	O3	3	0
2003	Outside	O1	1	1
2003	Outside	O1	2	2
2003	Outside	O1	3	1
2003	Outside	O2	1	1
2003	Outside	O2	2	2
2003	Outside	O2	3	0
2004	SZ	S1	1	2
2004	SZ	S1	2	0
2004	SZ	S1	3	0
2004	SZ	S2	1	0
2004	SZ	S2	2	2
2004	SZ	S2	3	1
2004	SZ	S3	1	5
2004	SZ	S3	2	0
2004	SZ	S3	3	2
2004	HPZ	H1	1	0
2004	HPZ	H1	2	1
2004	HPZ	H1	3	0
2004	HPZ	H2	1	0
2004	HPZ	H2	2	0
2004	HPZ	H2	3	0
2004	HPZ	H3	1	1
2004	HPZ	H3	2	0
2004	HPZ	H3	3	1
2004	Outside	O3	1	1
2004	Outside	O3	2	1
2004	Outside	O3	3	2
2004	Outside	O1	1	1
2004	Outside	O1	2	1
2004	Outside	O1	3	4
2004	Outside	O2	1	1
2004	Outside	O2	2	0
2004	Outside	O2	3	0
2005	SZ	S1	1	4
2005	SZ	S1	2	4
2005	SZ	S1	3	3
2005	SZ	S2	1	10
2005	SZ	S2	2	9
2005	SZ	S2	3	2
2005	SZ	S3	1	7
2005	SZ	S3	2	6
2005	SZ	S3	3	3
2005	HPZ	H1	1	2
2005	HPZ	H1	2	2
2005	HPZ	H1	3	2
2005	HPZ	H2	1	4
2005	HPZ	H2	2	3
2005	HPZ	H2	3	7
2005	HPZ	H3	1	7
2005	HPZ	H3	2	1
2005	HPZ	H3	3	3
2005	Outside	O3	1	1
2005	Outside	O3	2	3
2005	Outside	O3	3	3
2005	Outside	O1	1	0
2005	Outside	O1	2	3
2005	Outside	O1	3	1
2005	Outside	O2	1	2
2005	Outside	O2	2	2
2005	Outside	O2	3	0
2006	SZ	S1	1	3
2006	SZ	S1	2	4
2006	SZ	S1	3	1
2006	SZ	S2	1	5
2006	SZ	S2	2	9
2006	SZ	S2	3	1
2006	SZ	S3	1	4
2006	SZ	S3	2	1
2006	SZ	S3	3	2
2006	HPZ	H1	1	0
2006	HPZ	H1	2	0
2006	HPZ	H1	3	0
2006	HPZ	H2	1	0
2006	HPZ	H2	2	0
2006	HPZ	H2	3	2
2006	HPZ	H3	1	0
2006	HPZ	H3	2	0
2006	HPZ	H3	3	0
2006	Outside	O3	1	0
2006	Outside	O3	2	0
2006	Outside	O3	3	1
2006	Outside	O1	1	3
2006	Outside	O1	2	0
2006	Outside	O1	3	1
2006	Outside	O2	1	0
2006	Outside	O2	2	2
2006	Outside	O2	3	0
2007	SZ	S1	1	6
2007	SZ	S1	2	4
2007	SZ	S1	3	3
2007	SZ	S2	1	2
2007	SZ	S2	2	2
2007	SZ	S2	3	0
2007	SZ	S3	1	2
2007	SZ	S3	2	1
2007	SZ	S3	3	2
2007	HPZ	H1	1	2
2007	HPZ	H1	2	0
2007	HPZ	H1	3	0
2007	HPZ	H2	1	0
2007	HPZ	H2	2	2
2007	HPZ	H2	3	0
2007	HPZ	H3	1	3
2007	HPZ	H3	2	2
2007	HPZ	H3	3	0
2007	Outside	O3	1	2
2007	Outside	O3	2	1
2007	Outside	O3	3	0
2007	Outside	O1	1	1
2007	Outside	O1	2	4
2007	Outside	O1	3	1
2007	Outside	O2	1	1
2007	Outside	O2	2	0
2007	Outside	O2	3	2
2008	SZ	S1	1	4
2008	SZ	S1	2	1
2008	SZ	S1	3	1
2008	SZ	S2	1	5
2008	SZ	S2	2	1
2008	SZ	S2	3	3
2008	SZ	S3	1	4
2008	SZ	S3	2	3
2008	SZ	S3	3	2
2008	HPZ	H1	1	2
2008	HPZ	H1	2	0
2008	HPZ	H1	3	2
2008	HPZ	H2	1	0
2008	HPZ	H2	2	5
2008	HPZ	H2	3	8
2008	HPZ	H3	1	1
2008	HPZ	H3	2	0
2008	HPZ	H3	3	2
2008	Outside	O3	1	1
2008	Outside	O3	2	2
2008	Outside	O3	3	2
2008	Outside	O1	1	2
2008	Outside	O1	2	0
2008	Outside	O1	3	1
2008	Outside	O2	1	2
2008	Outside	O2	2	7
2008	Outside	O2	3	3
2009	SZ	S1	1	4
2009	SZ	S1	2	4
2009	SZ	S1	3	6
2009	SZ	S2	1	15
2009	SZ	S2	2	2
2009	SZ	S2	3	7
2009	SZ	S3	1	6
2009	SZ	S3	2	4
2009	SZ	S3	3	6
2009	HPZ	H1	1	0
2009	HPZ	H1	2	1
2009	HPZ	H1	3	1
2009	HPZ	H2	1	2
2009	HPZ	H2	2	1
2009	HPZ	H2	3	5
2009	HPZ	H3	1	1
2009	HPZ	H3	2	2
2009	HPZ	H3	3	1
2009	Outside	O3	1	0
2009	Outside	O3	2	2
2009	Outside	O3	3	1
2009	Outside	O1	1	1
2009	Outside	O1	2	3
2009	Outside	O1	3	4
2009	Outside	O2	1	7
2009	Outside	O2	2	2
2009	Outside	O2	3	1
2010	SZ	S1	1	2
2010	SZ	S1	2	1
2010	SZ	S1	3	6
2010	SZ	S2	1	3
2010	SZ	S2	2	6
2010	SZ	S2	3	5
2010	SZ	S3	1	1
2010	SZ	S3	2	1
2010	SZ	S3	3	7
2010	HPZ	H1	1	1
2010	HPZ	H1	2	1
2010	HPZ	H1	3	0
2010	HPZ	H2	1	1
2010	HPZ	H2	2	2
2010	HPZ	H2	3	1
2010	HPZ	H3	1	0
2010	HPZ	H3	2	2
2010	HPZ	H3	3	0
2010	Outside	O3	1	1
2010	Outside	O3	2	1
2010	Outside	O3	3	2
2010	Outside	O1	1	0
2010	Outside	O1	2	1
2010	Outside	O1	3	1
2010	Outside	O2	1	1
2010	Outside	O2	2	1
2010	Outside	O2	3	0
2011	SZ	S1	1	1
2011	SZ	S1	2	2
2011	SZ	S1	3	1
2011	SZ	S2	1	1
2011	SZ	S2	2	3
2011	SZ	S2	3	2
2011	SZ	S3	1	2
2011	SZ	S3	2	2
2011	SZ	S3	3	2
2011	HPZ	H1	1	0
2011	HPZ	H1	2	1
2011	HPZ	H1	3	2
2011	HPZ	H2	1	0
2011	HPZ	H2	2	1
2011	HPZ	H2	3	2
2011	HPZ	H3	1	1
2011	HPZ	H3	2	2
2011	HPZ	H3	3	2
2011	Outside	O3	1	1
2011	Outside	O3	2	3
2011	Outside	O3	3	2
2011	Outside	O1	1	1
2011	Outside	O1	2	1
2011	Outside	O1	3	4
2011	Outside	O2	1	3
2011	Outside	O2	2	2
2011	Outside	O2	3	0
2013	SZ	S1	1	2
2013	SZ	S1	2	7
2013	SZ	S1	3	0
2013	SZ	S2	1	4
2013	SZ	S2	2	1
2013	SZ	S2	3	3
2013	SZ	S3	1	1
2013	SZ	S3	2	3
2013	SZ	S3	3	3
2013	HPZ	H1	1	0
2013	HPZ	H1	2	0
2013	HPZ	H1	3	1
2013	HPZ	H2	1	2
2013	HPZ	H2	2	1
2013	HPZ	H2	3	5
2013	HPZ	H3	1	0
2013	HPZ	H3	2	0
2013	HPZ	H3	3	0
2013	Outside	O3	1	0
2013	Outside	O3	2	3
2013	Outside	O3	3	1
2013	Outside	O1	1	0
2013	Outside	O1	2	2
2013	Outside	O1	3	1
2013	Outside	O2	1	2
2013	Outside	O2	2	2
2013	Outside	O2	3	0
2014	SZ	S1	1	7
2014	SZ	S1	2	13
2014	SZ	S1	3	2
2014	SZ	S2	1	3
2014	SZ	S2	2	9
2014	SZ	S2	3	2
2014	SZ	S3	1	15
2014	SZ	S3	2	2
2014	SZ	S3	3	7
2014	HPZ	H1	1	5
2014	HPZ	H1	2	2
2014	HPZ	H1	3	6
2014	HPZ	H2	1	3
2014	HPZ	H2	2	4
2014	HPZ	H2	3	4
2014	HPZ	H3	1	2
2014	HPZ	H3	2	5
2014	HPZ	H3	3	4
2014	Outside	O3	1	3
2014	Outside	O3	2	3
2014	Outside	O3	3	7
2014	Outside	O1	1	2
2014	Outside	O1	2	3
2014	Outside	O1	3	6
2014	Outside	O2	1	2
2014	Outside	O2	2	4
2014	Outside	O2	3	3

## Sheet: lengths in mm
SZ	HPZ	Out side
189.434	153.48	175.452
190.221	164.826	189.013
192.221	165.237	190.341
196.723	171.417	197.848
197.343	171.892	198.574
198.097	177.661	199.294
200.704	177.854	200.105
201.961	177.896	202.225
202.068	180.901	205.415
203.611	182.633	205.78
204.664	186.331	206.952
205.287	188.065	206.986
205.897	192.863	208.142
206.33	193.625	208.19
206.39	193.84	210.089
208.589	195.404	210.343
210.094	196.192	212.783
213.366	196.523	212.9
213.378	198.394	215.781
213.631	198.773	219.569
214.454	199.253	220.689
214.851	199.402	220.718
216.033	200.08	221.24
216.125	200.342	221.407
217.415	200.798	222.21
219.485	204.268	223.386
219.749	204.726	223.845
220.067	204.75	224.01
220.114	205.391	225.541
220.936	205.737	226.347
222.357	206.233	226.365
222.584	207.938	227.207
223.049	209.129	227.937
223.334	211.129	228.309
223.5	212.818	229.039
223.664	212.967	229.303
224.247	213.031	231.912
225.896	213.443	232.495
226.137	213.563	235.978
226.439	214.488	237.078
227.161	214.596	240.025
228.702	216.279	240.605
229.916	216.62	240.971
229.953	216.682	243.203
230.154	216.923	245.116
230.353	218.626	245.597
230.805	219.602	246.881
230.855	220.417	250.467
230.925	222.734	253.099
231.501	224.464	255.56
231.878	225.348	256.931
232.092	227.535	258.092
232.318	227.653	258.32
233.325	227.748	259.1
234.386	228.248	259.162
236.574	230.145	263.692
237.172	230.359	267.548
237.233	230.999	269.038
237.402	231.98	269.188
237.747	232.435	271.116
238.006	233.104	272.283
238.842	233.667	273.164
239.233	235.739	275.189
239.542	235.987	277.338
240.124	236.161	279.376
240.158	236.571	279.916
240.405	236.942	281.404
240.978	237.03	284.356
241.18	237.139	290.027
241.471	238.859	305.735
242.987	239.449	315.218
242.998	239.524	368.174
244.018	241.236
244.602	241.942
244.655	242.136
244.704	242.727
245.827	243.608
245.948	244.08
246.495	244.707
246.543	245.763
247.047	245.851
247.251	246.598
247.694	246.971
247.754	247.133
248.179	248.864
248.217	249.526
249.43	249.559
250.523	250.796
250.741	251.816
250.822	252.399
250.907	252.935
250.949	257.868
251.288	258.151
251.912	260.09
252.256	262.355
252.277	263.217
252.599	265.216
252.906	266.725
254.4	270.936
254.982	279.067
255.453	280.68
255.678	281.528
255.934	281.678
255.984	296.313
256.141	310.211
256.167	315.6
256.704	323.329
257.714	340.037
259.892	383.266
260.324
260.7
261.43
261.533
261.754
262.129
262.24
262.489
263.593
263.599
263.644
264.207
264.927
265.123
265.527
265.97
266.213
266.362
267.022
267.109
267.249
267.501
267.794
267.842
268.021
268.124
268.532
268.709
269.486
269.906
269.934
270.332
270.69
271.959
272.485
272.756
273.245
273.655
274.088
274.198
274.647
275.98
276.433
276.732
277.27
277.674
277.801
279.069
279.302
279.334
279.722
279.968
280.054
280.234
280.667
281.285
281.358
281.629
284.097
284.249
284.695
284.786
285.94
286.221
287.021
288.033
288.277
288.569
288.954
289.697
290.028
291.957
292.752
293.666
294.161
295.658
296.471
297.855
299.536
300.634
302.112
302.941
303.541
304.336
305.968
306.711
307.844
308.231
308.25
309.168
309.277
309.584
310.223
311.551
312.066
312.491
313.082
313.711
314.345
318.009
319.656
320.204
320.727
322.874
328.702
331.774
331.933
332.722
333.176
335.007
335.658
337.576
341.305
342.14
343.543
343.879
344.127
344.685
345.134
353.405
353.551
353.561
355.499
357.153
359.324
360.556
361.454
363.668
365.946
374.881
376.244
380.19
384.275
397.812
398.051
399.196
405.68
407.286
407.564
420.053
669.942

## Sheet: MaxN deep
year	management type	Site	rep	MaxN
2010	SZ	S4	1	0
2010	SZ	S4	2	4
2010	SZ	S4	3	2
2010	SZ	S4	4	0
2010	SZ	S5	1	1
2010	SZ	S5	2	1
2010	SZ	S5	3	1
2010	SZ	S5	4	4
2010	SZ	S6	1	3
2010	SZ	S6	2	4
2010	SZ	S6	3	3
2010	SZ	S6	4	5
2010	SZ	S7	1	4
2010	SZ	S7	2	4
2010	SZ	S7	3	1
2010	SZ	S7	4	2
2010	SZ	S8	1	2
2010	SZ	S8	2	5
2010	SZ	S8	3	4
2010	SZ	S8	4	2
2010	SZ	S9	1	3
2010	SZ	S9	2	5
2010	SZ	S9	3	10
2010	SZ	S9	4	15
2010	HPZ	H4	1	0
2010	HPZ	H4	2	1
2010	HPZ	H4	3	0
2010	HPZ	H4	4	0
2010	HPZ	H5	1	0
2010	HPZ	H5	2	0
2010	HPZ	H5	3	0
2010	HPZ	H5	4	0
2010	HPZ	H6	1	4
2010	HPZ	H6	2	0
2010	HPZ	H6	3	2
2010	HPZ	H6	4	1
2010	HPZ	H7	1	0
2010	HPZ	H7	2	1
2010	HPZ	H7	3	8
2010	HPZ	H7	4	2
2010	HPZ	H8	1	2
2010	HPZ	H8	2	1
2010	HPZ	H8	3	16
2010	HPZ	H8	4	6
2010	HPZ	H9	1	0
2010	HPZ	H9	2	0
2010	HPZ	H9	3	1
2010	HPZ	H9	4	2
2010	Outside	O4	1	1
2010	Outside	O4	2	2
2010	Outside	O4	3	2
2010	Outside	O4	4	2
2010	Outside	O5	1	1
2010	Outside	O5	2	3
2010	Outside	O5	3	3
2010	Outside	O5	4	0
2010	Outside	O6	1	1
2010	Outside	O6	2	0
2010	Outside	O6	3	1
2010	Outside	O6	4	3
2010	Outside	O7	1	2
2010	Outside	O7	2	0
2010	Outside	O7	3	0
2010	Outside	O7	4	2
2011	SZ	S4	1	8
2011	SZ	S4	2	10
2011	SZ	S4	3	18
2011	SZ	S4	4	2
2011	SZ	S5	1	4
2011	SZ	S5	2	2
2011	SZ	S5	3	2
2011	SZ	S5	4	3
2011	SZ	S6	1	14
2011	SZ	S6	2	8
2011	SZ	S6	3	16
2011	SZ	S6	4	12
2011	SZ	S7	1	4
2011	SZ	S7	2	3
2011	SZ	S7	3	6
2011	SZ	S7	4	1
2011	SZ	S8	1	2
2011	SZ	S8	2	2
2011	SZ	S8	3	3
2011	SZ	S8	4	2
2011	SZ	S9	1	2
2011	SZ	S9	2	3
2011	SZ	S9	3	7
2011	SZ	S9	4	5
2011	HPZ	H4	1	2
2011	HPZ	H4	2	1
2011	HPZ	H4	3	0
2011	HPZ	H4	4	1
2011	HPZ	H5	1	2
2011	HPZ	H5	2	0
2011	HPZ	H5	3	0
2011	HPZ	H5	4	0
2011	HPZ	H6	1	4
2011	HPZ	H6	2	0
2011	HPZ	H6	3	1
2011	HPZ	H6	4	3
2011	HPZ	H7	1	0
2011	HPZ	H7	2	1
2011	HPZ	H7	3	0
2011	HPZ	H7	4	6
2011	HPZ	H8	1	2
2011	HPZ	H8	2	2
2011	HPZ	H8	3	11
2011	HPZ	H8	4	6
2011	HPZ	H9	1	2
2011	HPZ	H9	2	2
2011	HPZ	H9	3	1
2011	HPZ	H9	4	4
2011	Outside	O4	1	3
2011	Outside	O4	2	1
2011	Outside	O4	3	2
2011	Outside	O4	4	6
2011	Outside	O5	1	0
2011	Outside	O5	2	4
2011	Outside	O5	3	2
2011	Outside	O5	4	4
2011	Outside	O6	1	4
2011	Outside	O6	2	0
2011	Outside	O6	3	1
2011	Outside	O6	4	0
2011	Outside	O7	1	3
2011	Outside	O7	2	0
2011	Outside	O7	3	1
2011	Outside	O7	4	0
2011	Outside	O8	1	3
2011	Outside	O8	2	3
2011	Outside	O8	3	1
2011	Outside	O8	4	2
2011	Outside	O9	1	0
2011	Outside	O9	2	0
2011	Outside	O9	3	0
2011	Outside	O9	4	0
